# Supplementary material for: A minimally sufficient model for rib proximal-distal patterning based on genetic analysis and agent-based simulations
Source: eLife. 2017 Oct 25;6:e29144. doi: 10.7554/eLife.29144 (PMC5693115; doi:10.7554/eLife.29144)
Supplement: Figure 5—source data 1. [file elife-29144-fig5-data1.xlsx]

## Sheet: Sheet1
Genotype	litter	sample	section	side	dapi count	phh3 count	total dapi pixels	total somite pixels	# of pHH3+ pixels in constant area
sko	5133	1	2.26	a	128	13	24086	26448	nd
sko	5133	1	2.13	a	135	11	25354	30930	nd
sko	5133	2	3.12	a	224	12	42192	59030	nd
sko	5133	2	3.33	a	250	9	47235	82392	nd
sko	5133	2	3.39	a	177	9	33360	60452	nd
sko	5133	1	2.26	b	126	5	23755	24576	nd
sko	5133	1	2.13	b	98	7	18380	30676	nd
sko	5133	2	3.12	b	179	14	33664	50856	nd
sko	5133	2	3.33	b	205	14	38546	70973	nd
sko	5133	2	3.39	b	189	7	35638	58238	nd
dko	5133	3	1.39	a	116	2	21934	20799	nd
dko	5133	3	1.32	a	169	8	31914	23392	nd
dko	5133	3	1.49	a	156	6	29311	30265	nd
dko	5133	4	2.4	a	99	3	18589	23684	nd
dko	5133	4	2.16	a	71	2	13445	28656	nd
dko	5133	4	2.19	a	91	3	17106	31044	nd
dko	5133	3	1.39	b	104	4	19548	18274	nd
dko	5133	3	1.32	b	98	2	18522	18556	nd
dko	5133	3	1.49	b	89	6	16703	20337	nd
dko	5133	4	2.4	b	76	1	14364	18764	nd
dko	5133	4	2.16	b	50	0	9408	12892	nd
dko	5133	4	2.19	b	52	0	9843	26271	nd
ako	5133	6	1.22	a	158	7	29607	40070	nd
ako	5133	6	1.29	a	161	10	30147	44307	nd
ako	5133	6	1.14	a	216	9	40330	54227	nd
ako	5133	6	1.7	a	198	5	36933	44127	nd
ako	5133	6	1.22	b	185	4	34859	48086	nd
ako	5133	6	1.29	b	144	6	27171	43537	nd
ako	5133	6	1.14	b	207	5	38997	48052	nd
ako	5133	6	1.7	b	197	8	37181	41065	nd
nor	5133	7	1.8	a	291	23	54409	90457	nd
nor	5133	7	1.26	a	225	20	41985	91869	nd
nor	5133	7	1.17	a	214	8	39983	80543	nd
nor	5133	8	2.16	a	297	21	55455	81984	nd
nor	5133	7	1.2	a	172	12	32088	50830	nd
nor	5133	7	1.8	b	258	14	48697	72979	nd
nor	5133	7	1.26	b	234	17	44993	67735	nd
nor	5133	7	1.17	b	223	11	42110	71095	nd
nor	5133	8	2.16	b	257	17	48487	68088	nd
sko	5688	1	1.42	a	887	12	59388	113791	nd
sko	5688	1	1.49	a	344	8	195150	124137	nd
sko	5688	2	2	a	505	14	115155	125393	nd
sko	5688	2	2.8	a	424	12	99606	128426	nd
sko	5688	2	2.16	a	4454	14	81273	250912	nd
sko	5688	1	1.42	b	408	19	76299	126479	nd
sko	5688	1	1.49	b	351	17	116646	159090	nd
sko	5688	2	2	b	331	13	103091	161385	nd
sko	5688	2	2.8	b	233	15	85955	90320	nd
sko	5688	2	2.16	b	256	18	78845	194020	nd
dko	5688	3	1	a	268	2	60395	113791	nd
dko	5688	3	1.48	a	488	8	109974	124137	nd
dko	5688	3	1.36	a	344	8	77545	125393	nd
dko	5688	3	1.21	a	280	10	63089	128426	nd
dko	5688	3	1.14	a	664	7	149513	250912	nd
dko	5688	3	1	b	131	6	52084	126479	nd
dko	5688	3	1.48	b	274	4	109294	159090	nd
dko	5688	3	1.36	b	189	2	75149	161385	nd
dko	5688	3	1.21	b	166	3	66209	90320	nd
dko	5688	3	1.14	b	316	4	125950	194020	nd
nor	5688	4	1.25	a	139	12	156094	201027	nd
nor	5688	4	1.4	a	459	14	236958	218745	nd
nor	5688	4	1.15	a	590	16	139335	203909	nd
nor	5688	4	1.25	b	520	6	162389	201027	nd
nor	5688	4	1.4	b	260	10	140205	218745	nd
nor	5688	4	1.15	b	423	12	162477	203909	nd
sko	1633	3	3	a	nd	25	nd	149370	nd
dko	1633	1	1	a	nd	1	nd	173082	nd
nor	1633	2	2	a	nd	53	nd	421399	nd
sko	1633	3	3	b	nd	24	nd	143589	nd
dko	1633	1	1	b	nd	6	nd	220088	nd
nor	1633	2	2	b	nd	22	nd	327090	nd
nor	wm	1	1	a	nd	nd	nd	40298	7042
nor	wm	1	2	a	nd	nd	nd	40011	7066
nor	wm	1	3	a	nd	nd	nd	53390	7796
nor	wm	1	4	a	nd	nd	nd	53413	10077
ako	wm	2	1	a	nd	nd	nd	40204	6491
ako	wm	2	2	a	nd	nd	nd	37737	7272
ako	wm	2	3	a	nd	nd	nd	36822	5740
ako	wm	2	4	a	nd	nd	nd	37178	4645
ako	wm	5	1	a	nd	nd	nd	40523	5330
ako	wm	5	2	a	nd	nd	nd	27971	7028
ako	wm	5	3	a	nd	nd	nd	34462	6396
ako	wm	5	4	a	nd	nd	nd	34244	5707
sko	wm	3	1	a	nd	nd	nd	26870	6926
sko	wm	3	2	a	nd	nd	nd	25677	6865
sko	wm	3	3	a	nd	nd	nd	23951	8315
sko	wm	3	4	a	nd	nd	nd	23079	12258
dko	wm	4	1	a	nd	nd	nd	nd	2820
dko	wm	4	2	a	nd	nd	nd	nd	6749
dko	wm	4	3	a	nd	nd	nd	nd	4487
dko	wm	4	4	a	nd	nd	nd	nd	3053
nor	1633plus	1		a	nd	nd	nd	35383	nd
nor	1633plus	1		a	nd	nd	nd	26072	nd
nor	1633plus	1		a	nd	nd	nd	30637	nd
ako	1633plus	2		a	nd	nd	nd	18316	nd
ako	1633plus	2		a	nd	nd	nd	18502	nd
ako	1633plus	2		a	nd	nd	nd	11087	nd
sko	1633plus	3		a	nd	nd	nd	6164	nd
sko	1633plus	3		a	nd	nd	nd	9090	nd
sko	1633plus	3		a	nd	nd	nd	10045	nd
dko	1633plus	4		a	nd	nd	nd	4162	nd
dko	1633plus	4		a	nd	nd	nd	3921	nd
dko	1633plus	4		a	nd	nd	nd	4776	nd
nor	1855	1		a	nd	nd	nd	31220	nd
nor	1855	1		a	nd	nd	nd	24593	nd
nor	1855	1		a	nd	nd	nd	20253	nd
sko	1855	3		a	nd	nd	nd	5618	nd
sko	1855	3		a	nd	nd	nd	6178	nd
sko	1855	3		a	nd	nd	nd	7975	nd
nor	5083	1		a	nd	nd	nd	26283	nd
nor	5083	1		a	nd	nd	nd	23821	nd
nor	5083	1		a	nd	nd	nd	23906	nd
ako	5083	2		a	nd	nd	nd	21308	nd
ako	5083	2		a	nd	nd	nd	21983	nd
ako	5083	2		a	nd	nd	nd	17709	nd
sko	5083	3		a	nd	nd	nd	15003	nd
sko	5083	3		a	nd	nd	nd	14759	nd
sko	5083	3		a	nd	nd	nd	15632	nd
sko	5083	5		a	nd	nd	nd	19243	nd
sko	5083	5		a	nd	nd	nd	16377	nd
sko	5083	5		a	nd	nd	nd	16097	nd
dko	5083	4		a	nd	nd	nd	11993	nd
dko	5083	4		a	nd	nd	nd	12066	nd
dko	5083	4		a	nd	nd	nd	10240	nd
nor	3341	1		a	nd	nd	nd	16848	nd
nor	3341	1		a	nd	nd	nd	15961	nd
nor	3341	1		a	nd	nd	nd	16924	nd
nor	3341	5		a	nd	nd	nd	12224	nd
nor	3341	5		a	nd	nd	nd	12594	nd
nor	3341	5		a	nd	nd	nd	13242	nd
sko	3341	3		a	nd	nd	nd	11127	nd
sko	3341	3		a	nd	nd	nd	7810	nd
sko	3341	3		a	nd	nd	nd	9513	nd
dko	3341	4		a	nd	nd	nd	10396	nd
dko	3341	4		a	nd	nd	nd	9784	nd
dko	3341	4		a	nd	nd	nd	8112	nd
nor	4229	1		a	nd	nd	nd	14743	nd
nor	4229	1		a	nd	nd	nd	17188	nd
nor	4229	1		a	nd	nd	nd	15786	nd
ako	4229	2		a	nd	nd	nd	15012	nd
ako	4229	2		a	nd	nd	nd	13278	nd
ako	4229	2		a	nd	nd	nd	15767	nd
sko	4229	3		a	nd	nd	nd	7099	nd
sko	4229	3		a	nd	nd	nd	7291	nd
sko	4229	3		a	nd	nd	nd	7845	nd
dko	4229	4		a	nd	nd	nd	8854	nd
dko	4229	4		a	nd	nd	nd	9013	nd
dko	4229	4		a	nd	nd	nd	8167	nd
