# Supplementary material for: A minimally sufficient model for rib proximal-distal patterning based on genetic analysis and agent-based simulations
Source: eLife journal article supplement (doi:10.7554/elife.29144), 2017-10-25
Supplement: supp [file elife-29144-supp-v1.zip]

Figure 6 -figure supplement 3

A.

| Parameter                        | Settings |
|----------------------------------|----------|
| Initial size                     | 1        |
| Extent of Hh signal              | 12       |
| Hh intensity                     | 0.6      |
| Time                             | 46       |
| Probability of becoming proximal | 0.4      |
| Probability of becoming distal   | 0.4      |
| Peak cell death rate             | 0.3      |
| Proliferation rate               | variable |
| Duration of cell death           | 30       |

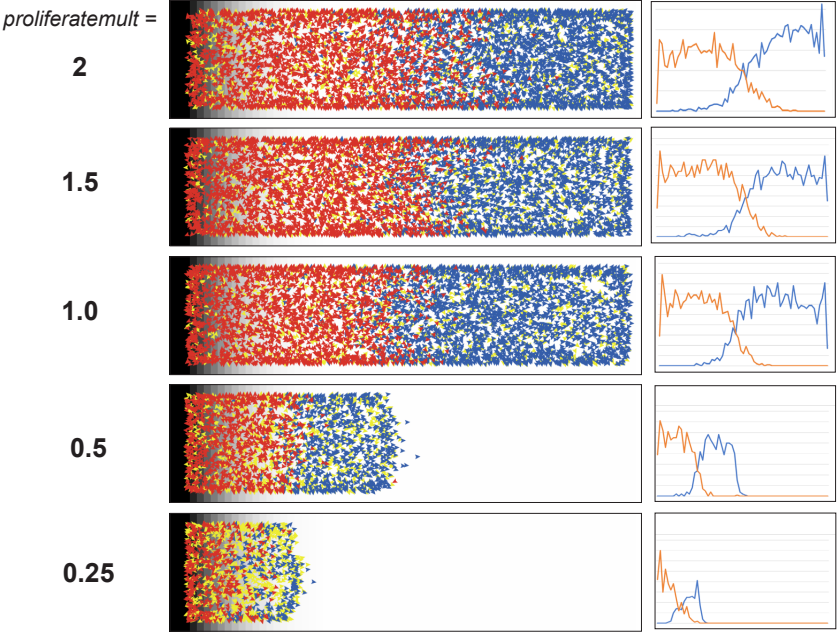

B.

| Parameter                        | Settings |
|----------------------------------|----------|
| Initial size                     | 1        |
| Extent of Hh signal              | 12       |
| Hh intensity                     | 0.6      |
| Time                             | 46       |
| Probability of becoming proximal | 0.4      |
| Probability of becoming distal   | 0.4      |
| Peak cell death rate             | variable |
| Proliferation rate               | 30       |
| Duration of cell death           | 30       |

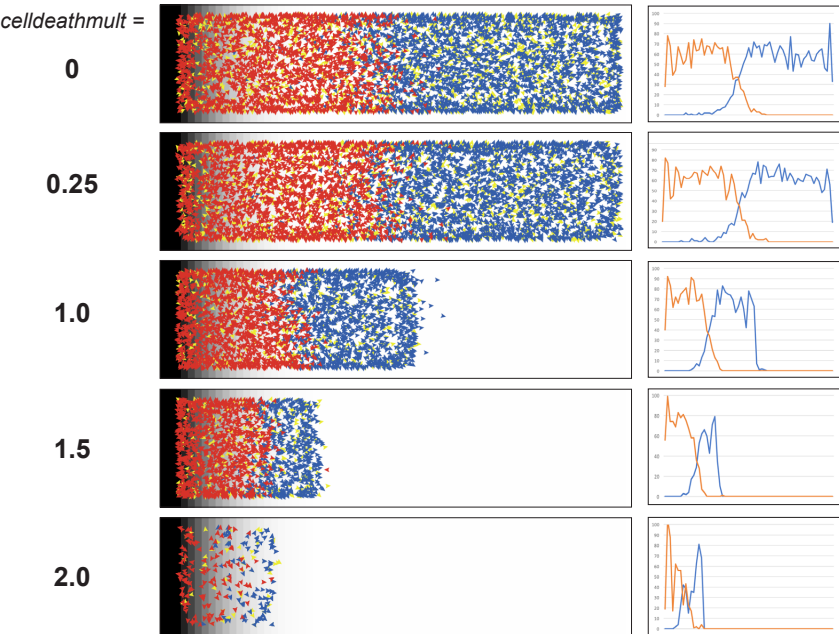

**A.** Varying the proliferation rate (using the Normal settings as baseline for the other parameters)

**B.** Varying the cell death rate (using the Normal settings as baseline for the other parameters)
