# Supplementary material for: A minimally sufficient model for rib proximal-distal patterning based on genetic analysis and agent-based simulations
Source: eLife journal article supplement (doi:10.7554/elife.29144), 2017-10-25
Supplement: supp [file elife-29144-supp-v1.zip]

Figure 6 -figure supplement 2

A.

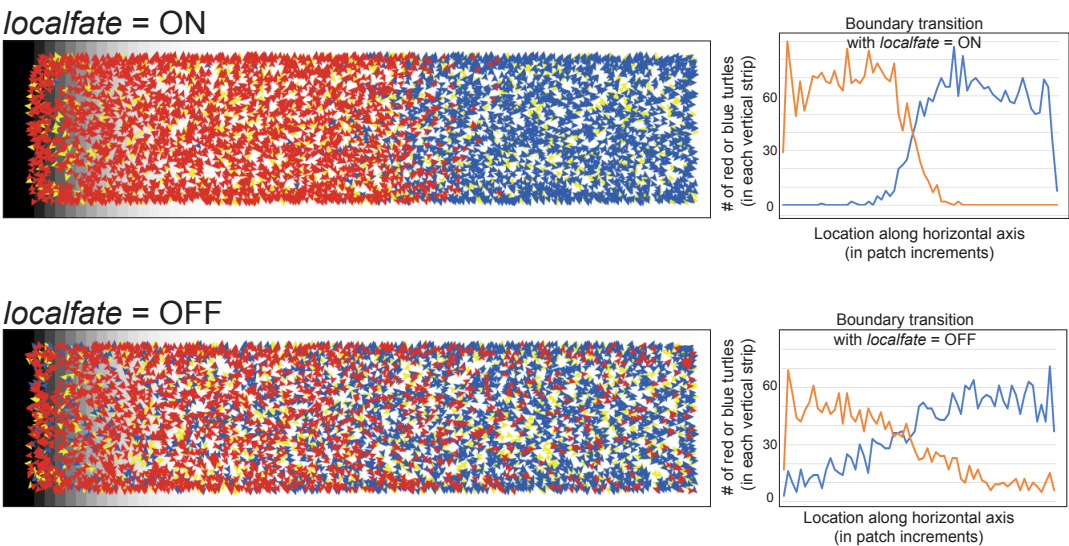

B.

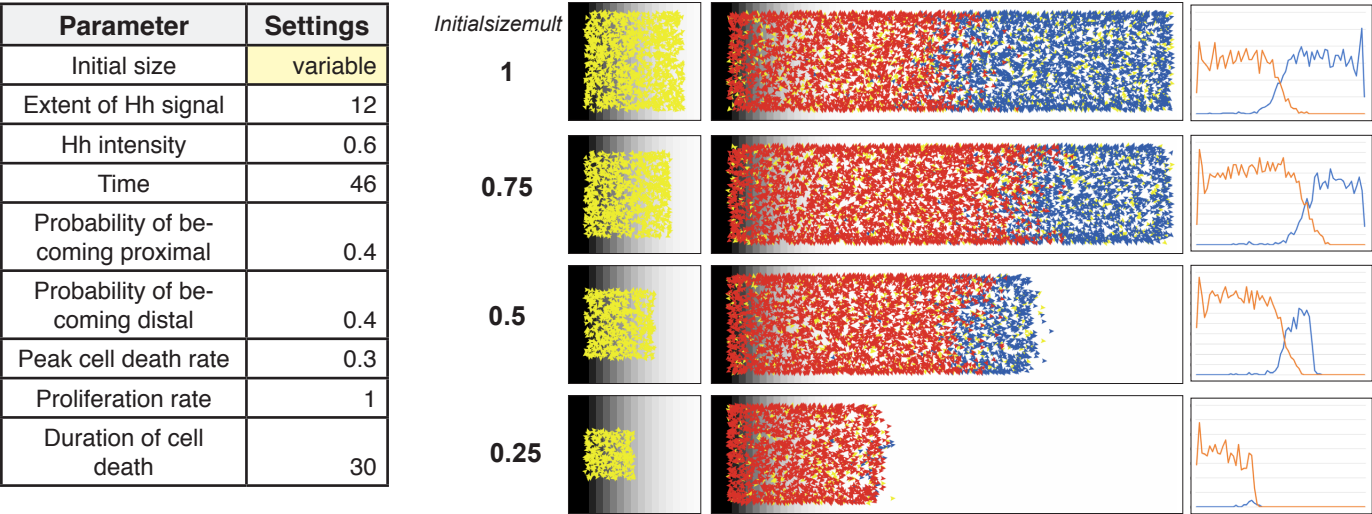

A. Effect of nearest neighbor on fate and boundary transition  
B. Varying the initial size (using the Normal settings as baseline for the other parameters)
