# Supplementary material for: A minimally sufficient model for rib proximal-distal patterning based on genetic analysis and agent-based simulations
Source: eLife journal article supplement (doi:10.7554/elife.29144), 2017-10-25
Supplement: supp [file elife-29144-supp-v1.zip]

Figure 6 -figure supplement 1

A.

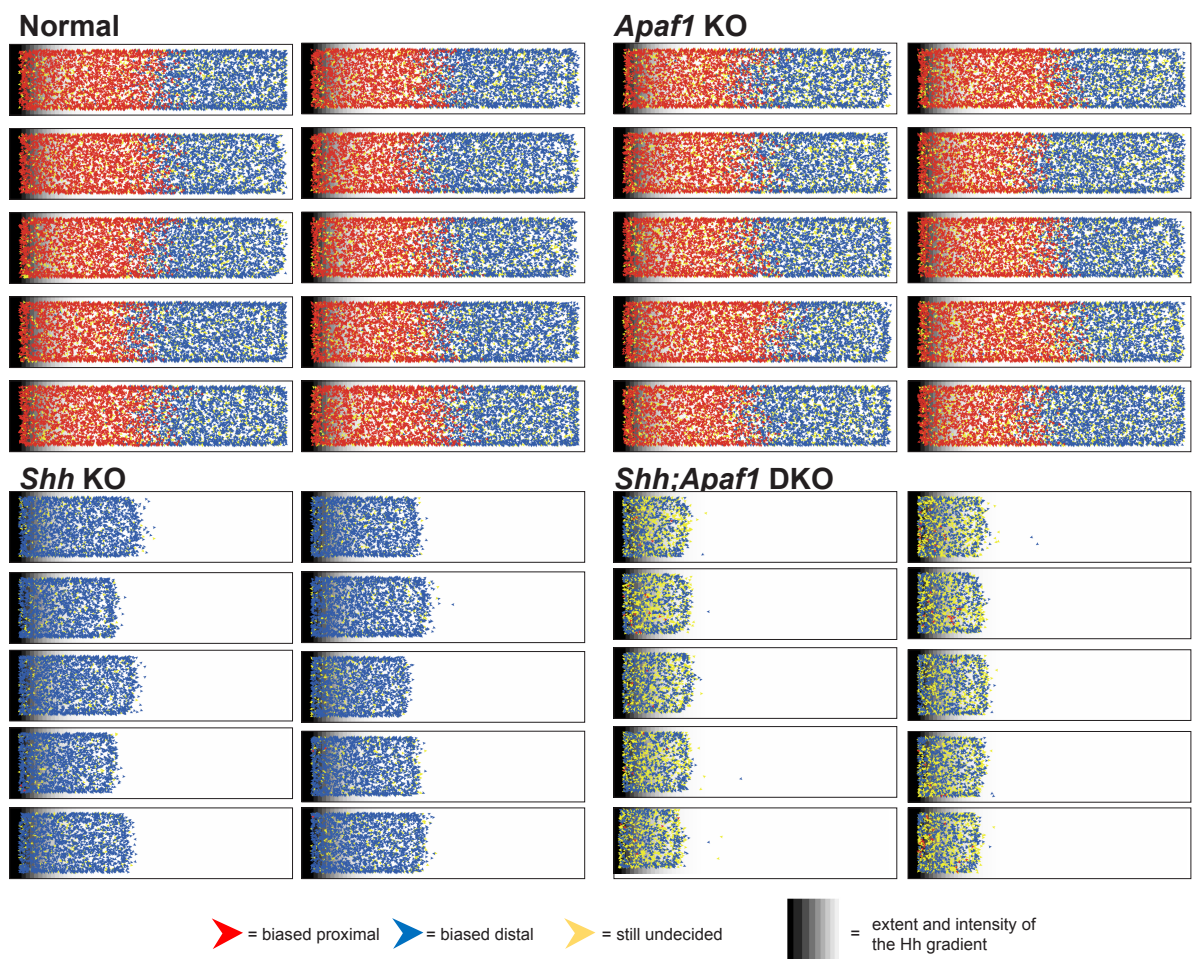

B.

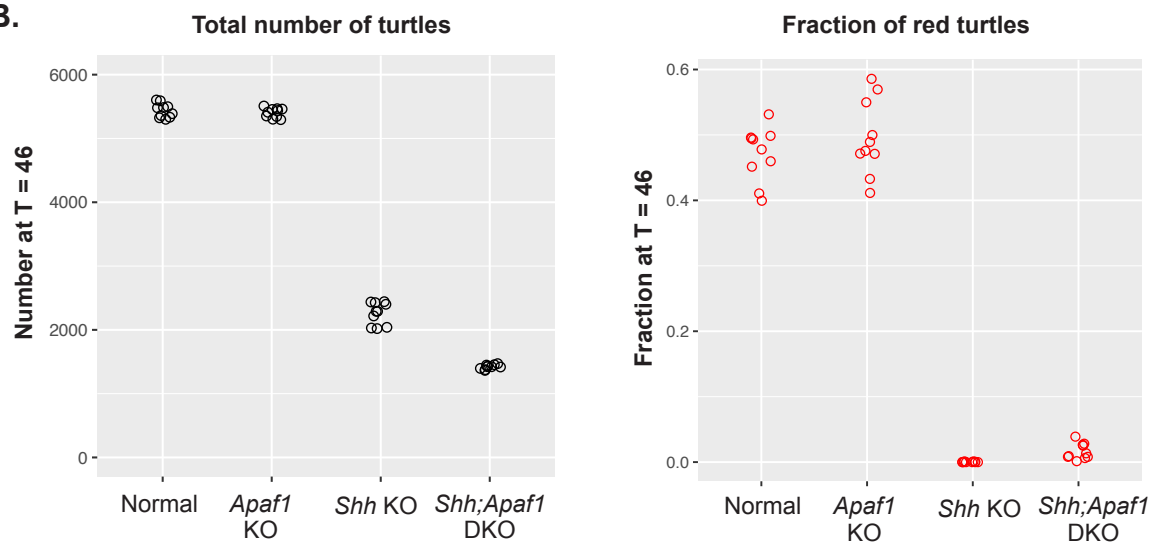

A. Outcome of 10 simulation runs using the parameters indicated in Table 1

B. Variability in outcome for the genotype simulations shown in A
