# Supplementary material for: A minimally sufficient model for rib proximal-distal patterning based on genetic analysis and agent-based simulations
Source: eLife journal article supplement (doi:10.7554/elife.29144), 2017-10-25
Supplement: supp [file elife-29144-supp-v1.zip]

Figure 3 -figure supplement 1

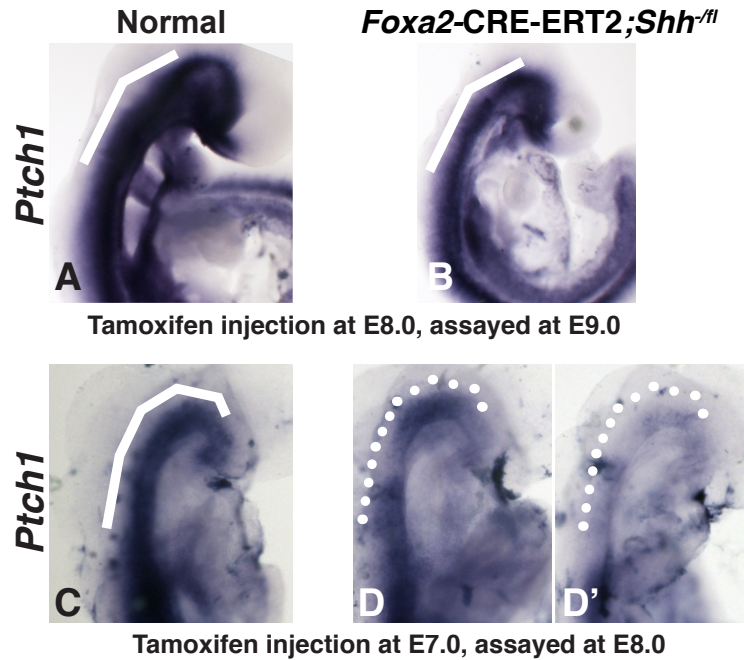

### Expression of *Ptch1* in *Foxa2-CRE-ERT2;Shh<sup>-/-</sup>* embryos

**A, B.** 24hrs after Tamoxifen injection at E8.0, *Ptch1* expression is still evident embryos carrying the conditional allele (B). This injection regimen failed to produce a *Shh* loss of function phenotype.

**C, D, D'.** 24hrs after Tamoxifen injection at E9.0 embryos carrying the conditional alleles (D, D') displayed discontinuities in *Ptch1* expression. This injection regimen resulted in the skeletal abnormalities depicted in Figure 3.
